# Supplementary material for: Novel pH-sensitive and biodegradable micelles for the combined delivery of doxorubicin and conferone to induce apoptosis in MDA-MB-231 breast cancer cell line
Source: PubMed Central journal article supplement (PMC9055950; doi:10.1039/d0ra03467c), 2020-08-07
Supplement: RA-010-D0RA03467C-s001.pdf [file RA-010-D0RA03467C-s001.pdf]

Electronic Supplementary Information (ESI) available: [details of any supplementary information available should be included here]. See DOI: 10.1039/x0xx00000x

Supplementary file of:

## Novel pH-sensitive and biodegradable micelles for combination delivery of Doxorubicin and Conferone to induce apoptosis in MDA-MB-231 breast cancer cell line

Akram Rahmani <sup>a</sup>, Hassan Zavvar Mousavi <sup>a,b\*</sup>, Roya Salehi <sup>c,d\*</sup>, Ahmad Bagheri <sup>a</sup>

<sup>a</sup> Department of Applied Chemistry, Faculty of Chemistry, Semnan University, Semnan, Iran.

<sup>b</sup> Department of Chemistry, Faculty of Science, University of Guilan, Rasht, P.O. Box 41335-1914, Rasht, Iran, E-mail-1: [hzmousavi@semnan.ac.ir](mailto:hzmousavi@semnan.ac.ir) and E-mail-2: [hzmousavi@guilan.ac.ir](mailto:hzmousavi@guilan.ac.ir).

<sup>c</sup> Drug Applied Research Center, Tabriz University of Medical Sciences, Tabriz, Iran, Tabriz, Iran, E-mail: [salehiro@tbzmed.ac.ir](mailto:salehiro@tbzmed.ac.ir).

<sup>d</sup> Department of Medical Nanotechnology, School of Advanced Medical Sciences, Tabriz University of Medical Sciences, Tabriz, Iran.

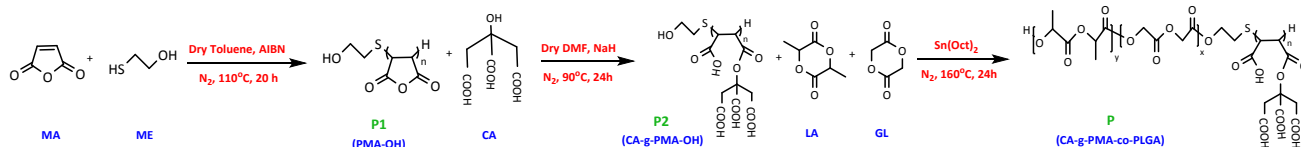

Figure 1-S: synthesis root of copolymer, Step 1: Synthesis of hydroxy terminated poly maleic anhydride (P1: PMA-OH), Step 2: Functionalization of PMA-OH with citric acid (P2: CA-g-PMA-OH), Step 3: Post co-polymerization of CA-g-PMA-OH with Lactide and Glycolide (P: CA-g-PMA-co-PLGA).

\*This figure is the same with Figure 1 in paper but in \*.cdx file type.

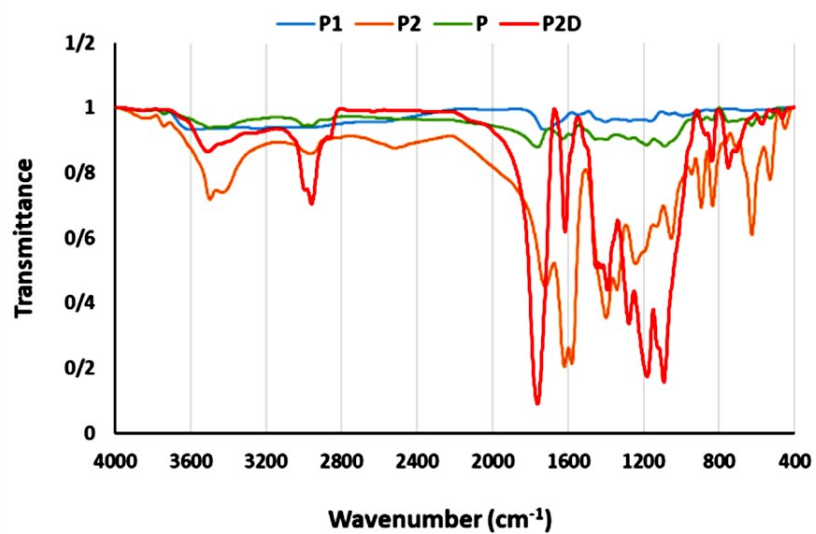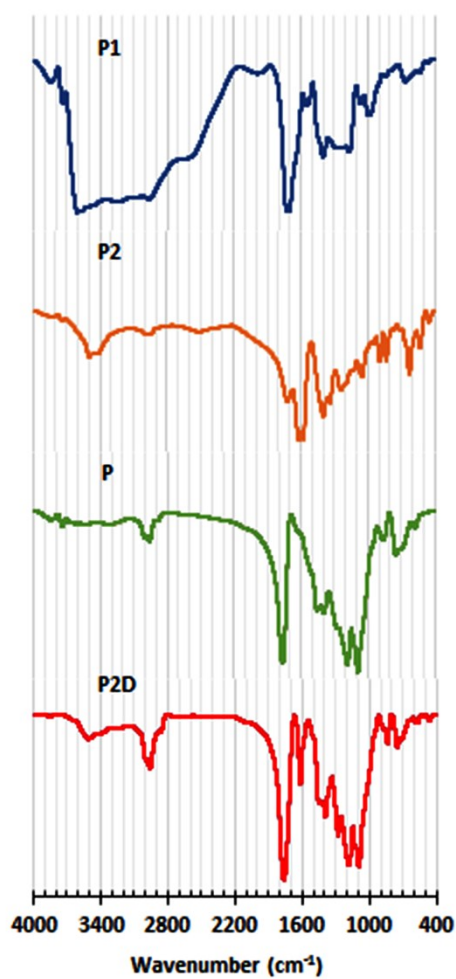

Figure 2-S: FTIR Spectra of: **P1**: (PMA-OH), **P2**: (CA-g-PMA-OH), **P**: (CA-g-PMA-co-PLGA), **P2D**: (Co-drug loaded copolymeric micelles).

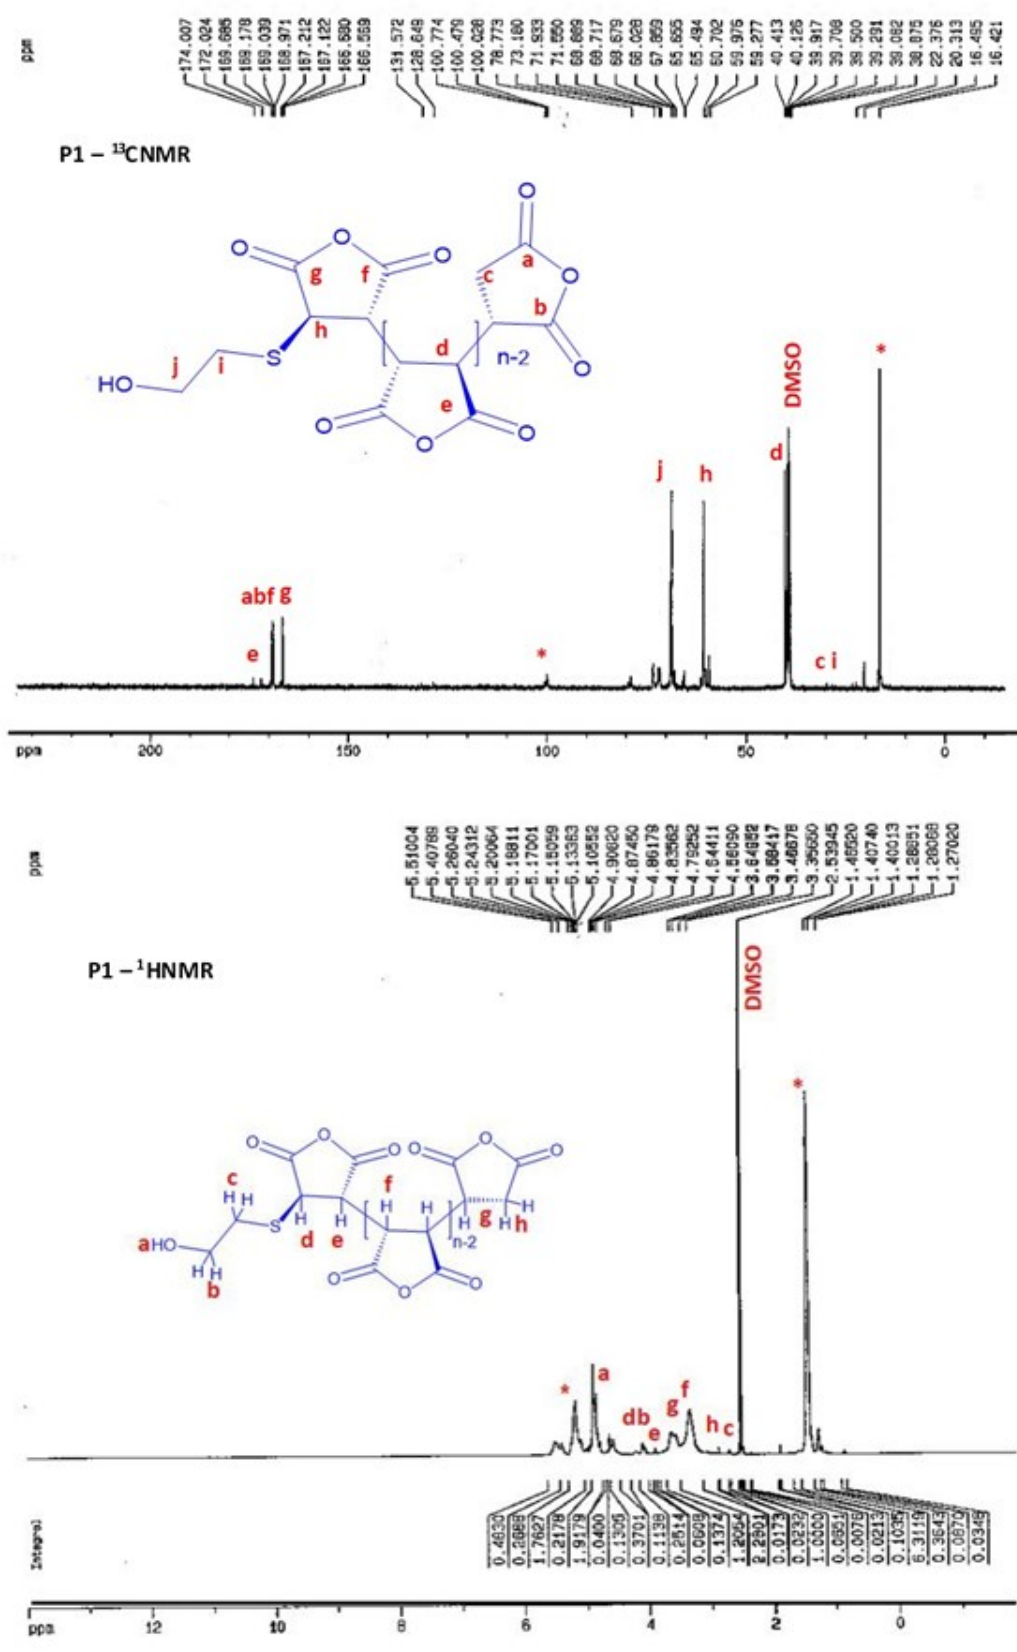

Figure 3-S: NMR spectra of **P1**: <sup>13</sup>CNMR spectra, that \* are the peaks related to solvent residue and <sup>1</sup>HNMR Spectra of **P1**, that \* are the peaks related to free mercapto ethanole.

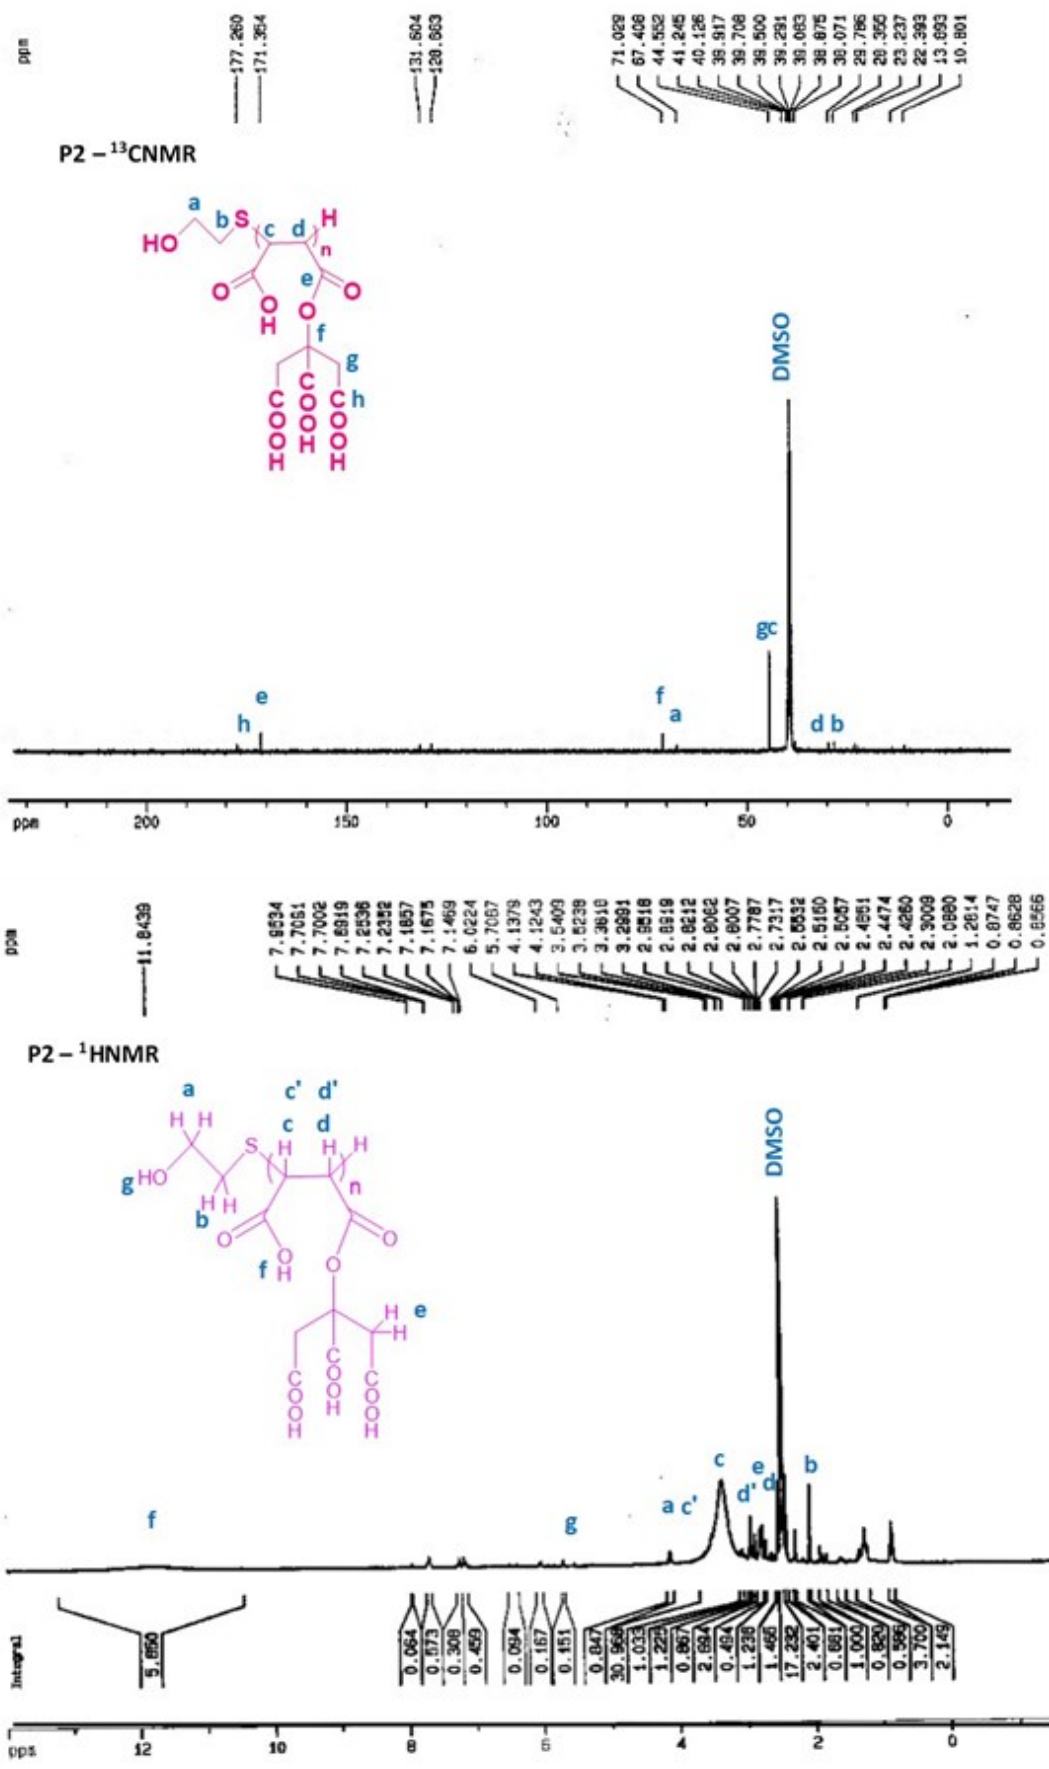

Figure 4-S: NMR spectra of P2: <sup>13</sup>CNMR spectra of P2, and <sup>1</sup>HNMR Spectra of P2, that c' and d' are the peaks related to the signals pertained to maleate group that was banded to -S.

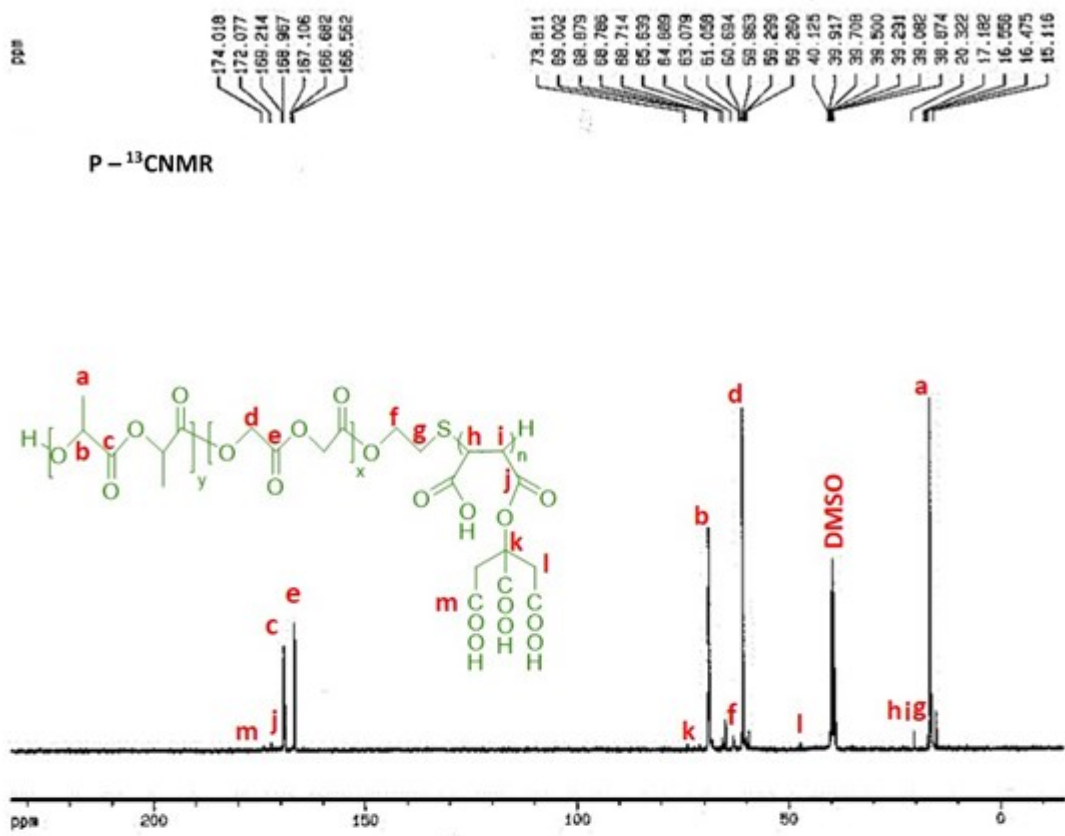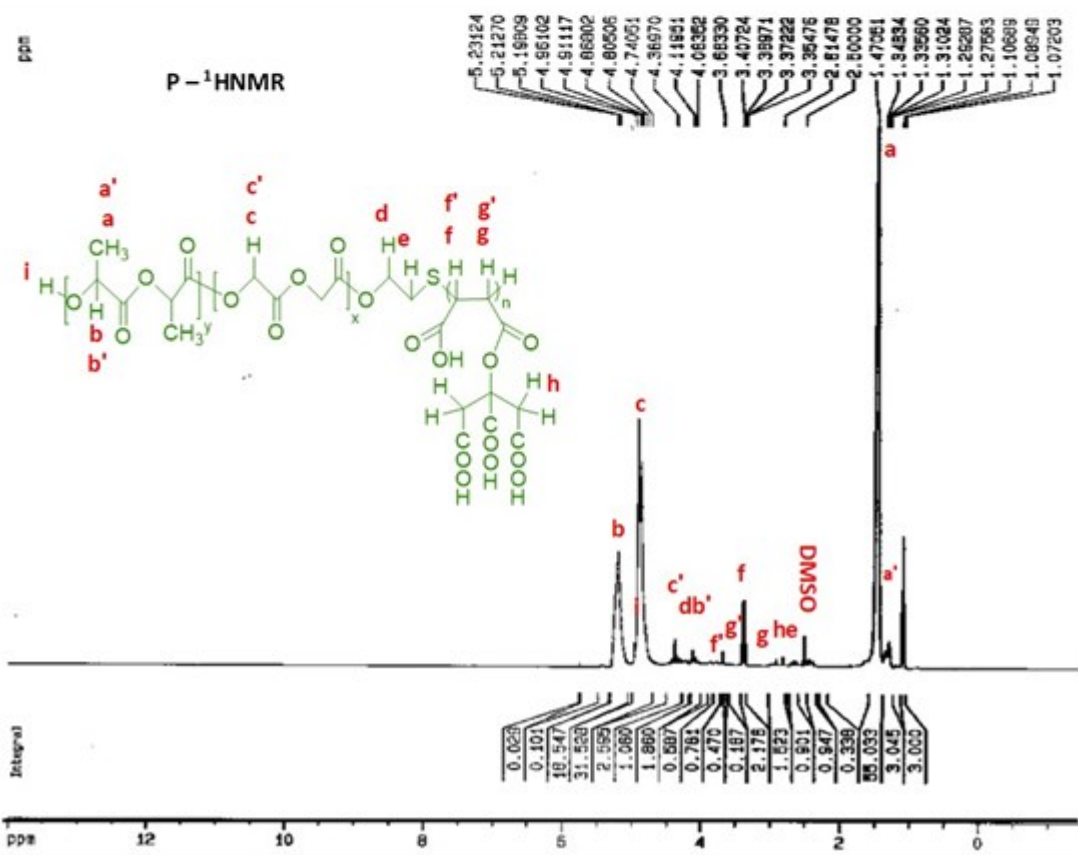

Figure 5-5: NMR spectra of P: <sup>13</sup>CNMR spectra of P, and <sup>1</sup>HNMR Spectra of P, that a', b' and c' are the peaks related to end groups, and f' and g' are the signals pertained to maleate group that was banded to -S.

### Calculation of molar mass of copolymer by $^1\text{H}$ NMR spectra

The molar mass ( $M_n$ ) of copolymer was determined with  $^1\text{H}$ NMR spectra, by integrating the signals pertaining to each monomer using following equation [Jay Wm. Wackerly, J. Chem. Educ]:

$$n_{\text{polymer}} = \frac{\sum_{i=1}^m \frac{I_i}{p_i}}{m}$$

$M_n = n$ . (monomers molecular mass)

Where,  $m$  is the number of polymer signals that used,  $I_i$  and  $p_i$  are the integration and number of protons related to  $i$ th polymer signal.

$$n_{\text{Lactide}} = \frac{\frac{55.03}{6} + \frac{18.542}{2}}{2} = 9.22$$

$$n_{\text{Glycolide}} = \frac{\frac{31.528}{4}}{1} = 7.882$$

$$n_{\text{MA}} = \frac{\frac{2.176}{1}}{1} = 2.176$$

$$n_{\text{CA}} = \frac{\frac{0.901}{4}}{1} = 0.225$$

$$n_{\text{ME}} = \frac{\frac{1.0596}{2}}{1} = 0.53$$

$$n_{\text{GL end group}} = \frac{\frac{2.5951}{2}}{1} = 1.297$$

$$n_{\text{LA end group}} = \frac{\frac{1.86}{1}}{1} = 1.86$$

$$M_n = (9.22 \times 144.13) + (7.882 \times 116.07) + (2.176 \times 98.06) + (0.225 \times 210.14) + (0.53 \times 74.08) + (1.86 \times 144.13) + 1 = 2965.43 \text{ g/mol}$$

$$M_n = (9.22 \times 144.13) + (7.882 \times 116.07) + (2.176 \times 98.06) + (0.225 \times 210.14) + (0.53 \times 74.08) + 1 = 2670.717 \text{ g/mol}$$

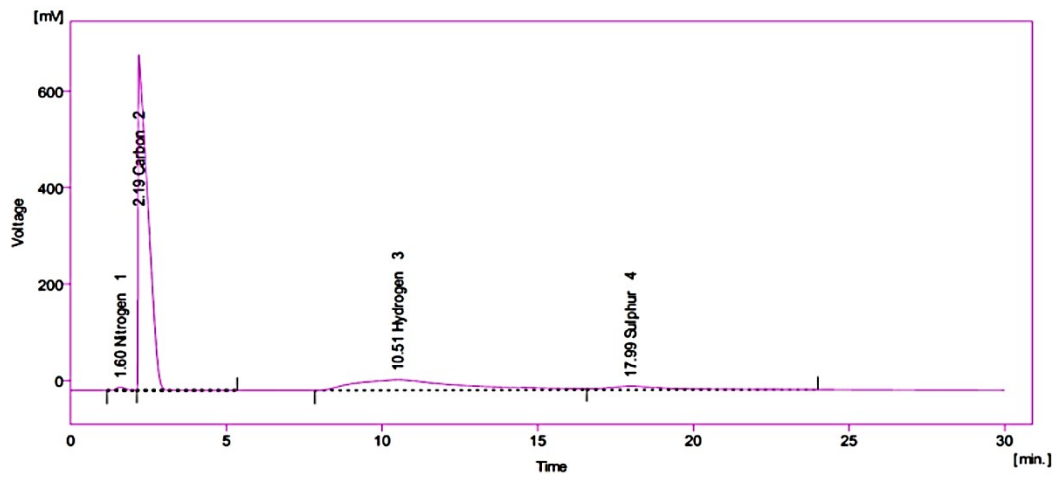

Figure 6-S: CHNS elemental analysis: plot of time (min) versus voltage (mV)

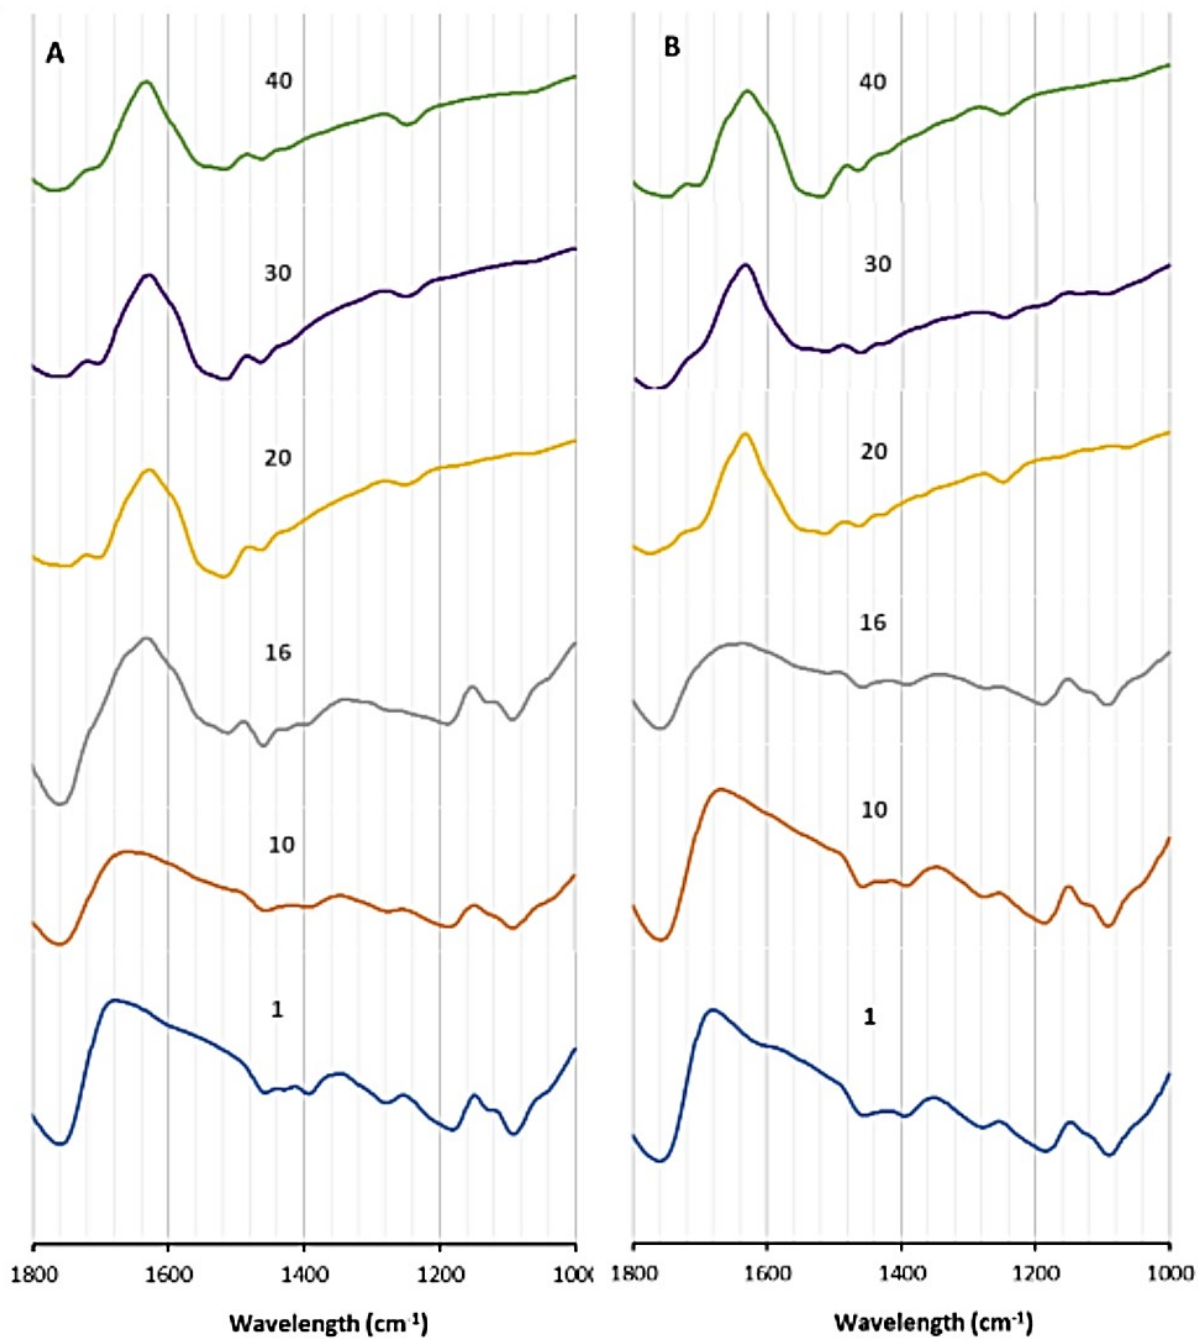

Figure 7-5: Copolymer FTIR spectra during degradation test after 1, 10, 16, 20, 30 and 40 day, wavenumber between 1000-1800 cm<sup>-1</sup>, in PBS with pH value of A) pH = 5.5; B) pH = 7.4.



**A**

|                                | Size (d.n...         | % Number: | St Dev (d.n... |
|--------------------------------|----------------------|-----------|----------------|
| <b>Z-Average (d.nm):</b> 192.6 | <b>Peak 1:</b> 112.6 | 100.0     | 44.13          |
| <b>PdI:</b> 0.367              | <b>Peak 2:</b> 0.000 | 0.0       | 0.000          |
| <b>Intercept:</b> 0.930        | <b>Peak 3:</b> 0.000 | 0.0       | 0.000          |

**Result quality Refer to quality report**

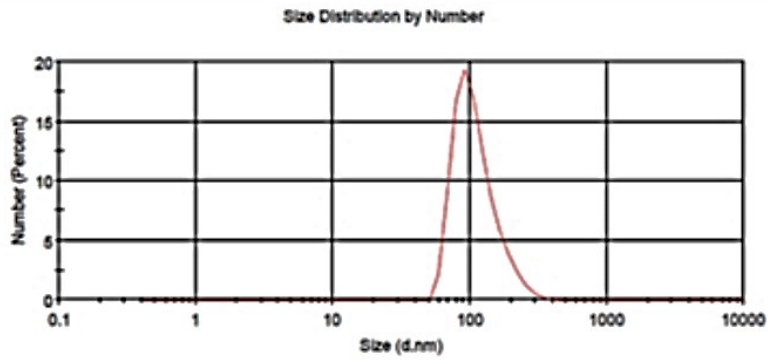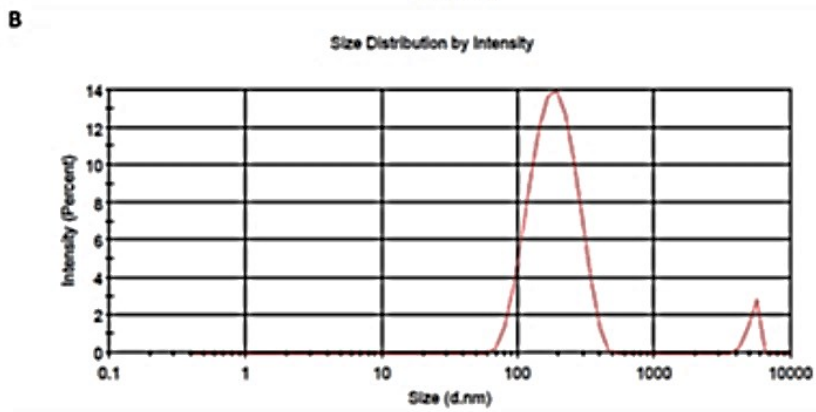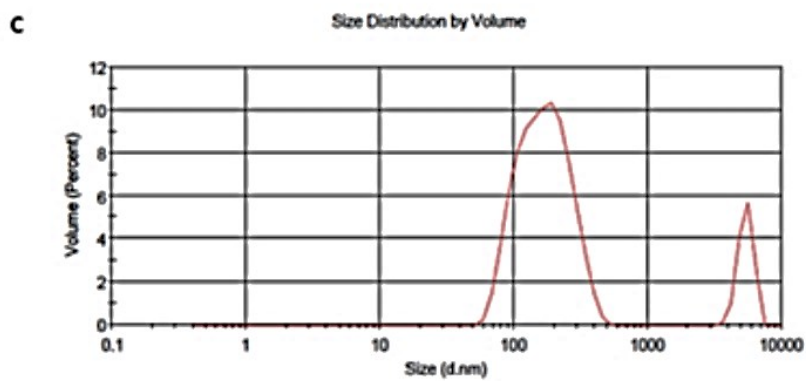

Figure 8-S: DLS results of P, A) number percent versus size (nm); B) Intensity percent versus size (nm); C) Volume percent versus size (nm).

|                                      | Mean (mV)     | Area (%) | St Dev (mV) |
|--------------------------------------|---------------|----------|-------------|
| <b>Zeta Potential (mV):</b> -29.7    | Peak 1: -29.7 | 100.0    | 3.93        |
| <b>Zeta Deviation (mV):</b> 3.93     | Peak 2: 0.00  | 0.0      | 0.00        |
| <b>Conductivity (mS/cm):</b> 0.00830 | Peak 3: 0.00  | 0.0      | 0.00        |
| <b>Result quality</b> Good           |               |          |             |

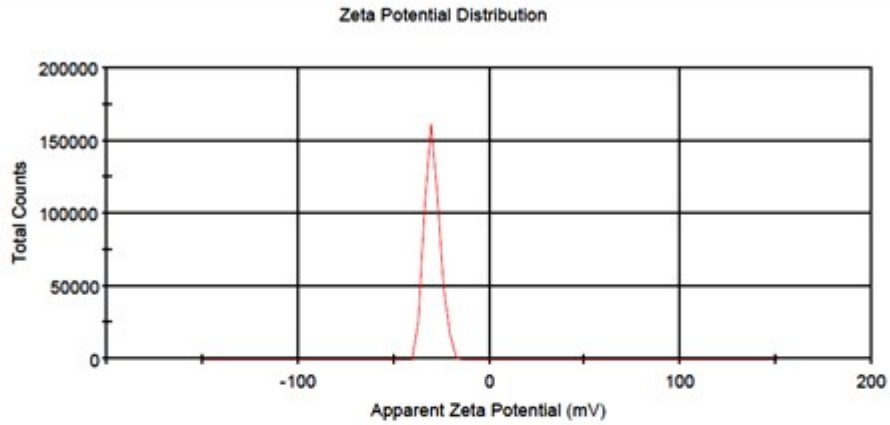

|                                    | Mean (mV)     | Area (%) | St Dev (mV) |
|------------------------------------|---------------|----------|-------------|
| <b>Zeta Potential (mV):</b> -6.57  | Peak 1: -6.57 | 100.0    | 3.61        |
| <b>Zeta Deviation (mV):</b> 3.61   | Peak 2: 0.00  | 0.0      | 0.00        |
| <b>Conductivity (mS/cm):</b> 0.216 | Peak 3: 0.00  | 0.0      | 0.00        |
| <b>Result quality</b> Good         |               |          |             |

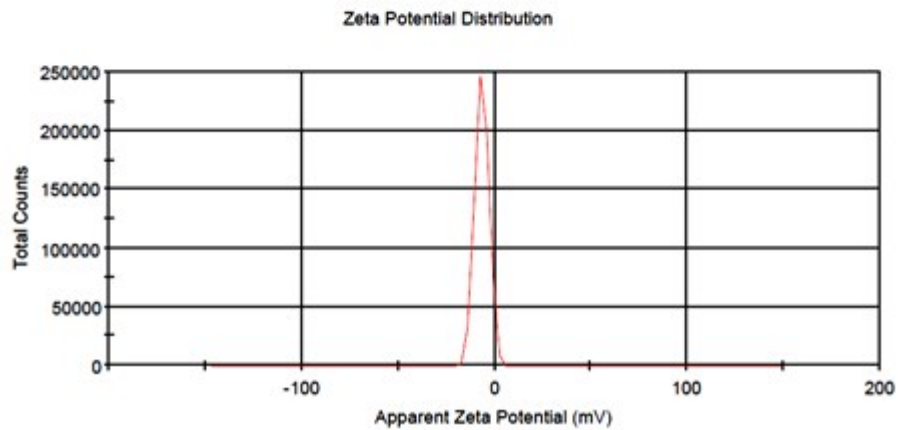

Figure 9-5: Results of zeta potential (mV) measurements for: A) Blank micelles (P) ; B) Co-drug loaded micelles (P2D)

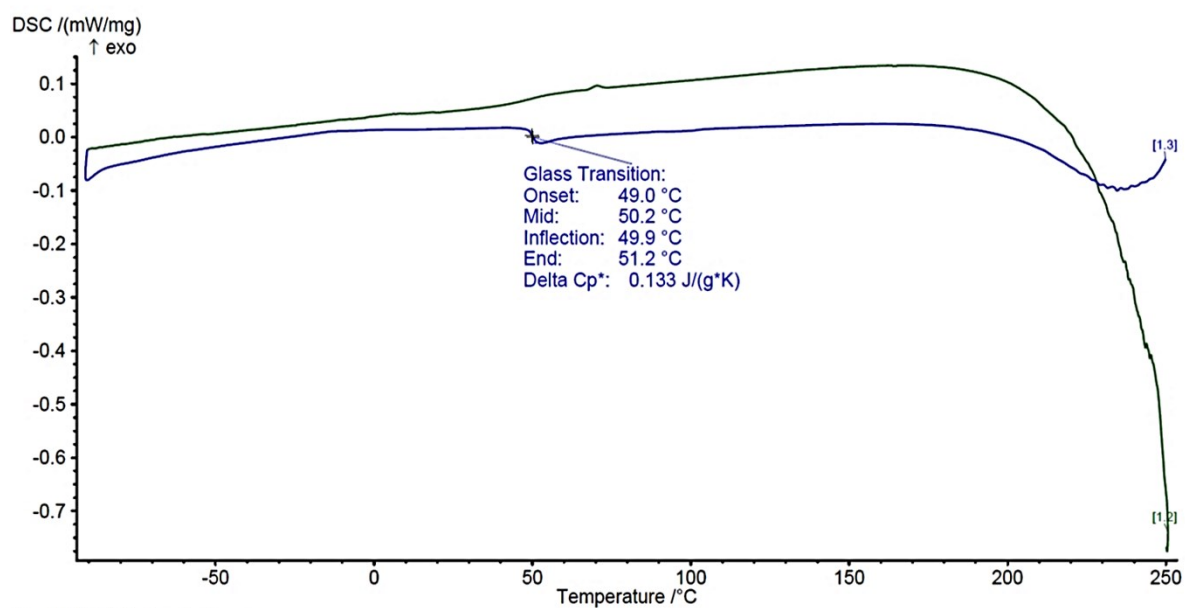

Figure 10-S: DSC plot of copolymer, plot of temperature vs. DSC.

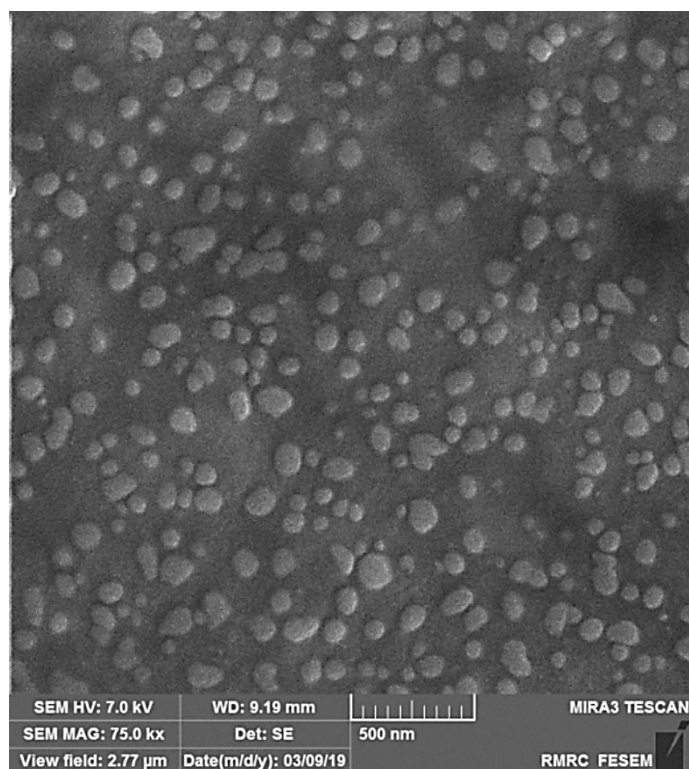

Figure 11-S: SEM image of blank micelles (P)

Table 1-S: Percentage of cellular uptake of RB-P and RB-P2D micelles in 0.5, 1.5, and 3 h into MDA-MB-231 cell line using flowcytometry.

| Cellular uptake % | Time (h) |      |      |
|-------------------|----------|------|------|
|                   | 0.5      | 1.5  | 3    |
| P                 | 33.2     | 60.5 | 81.5 |
| P2D               | 97.0     | 99.7 | 100  |

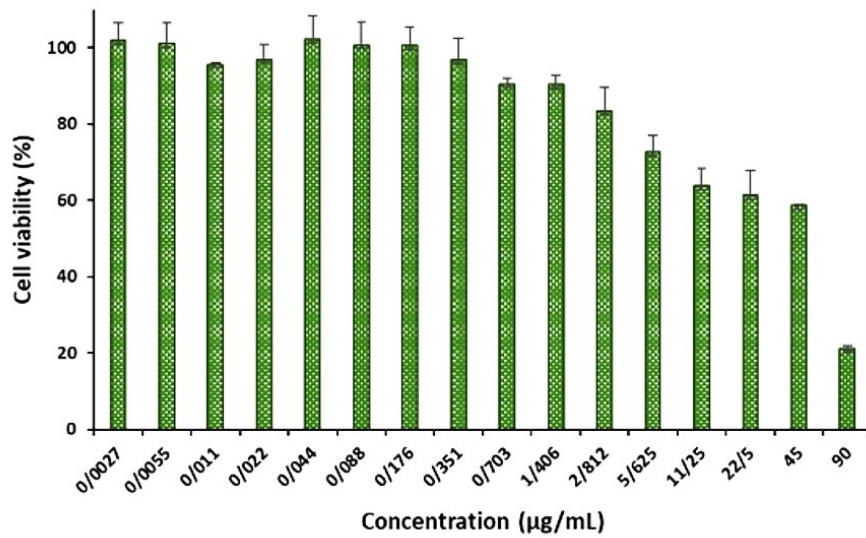

Figure 12-S: Conferone cytotoxicity on MDA-MB-231 cell lines, by MTT method.

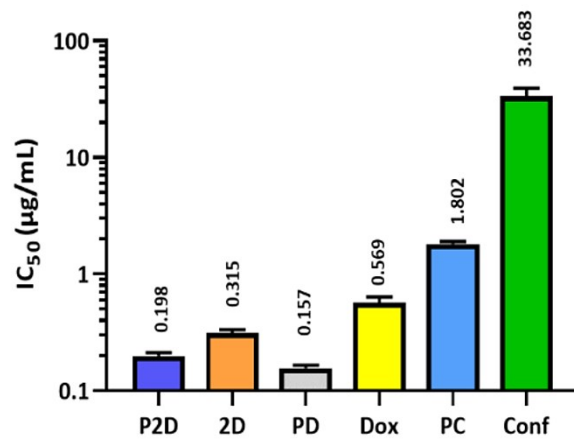

Figure 13-S: IC<sub>50</sub> plot of all formulations, P2D, 2D, PD, Dox, PC and Conf; calculated by prism software ( $P < 0.0001$ ).

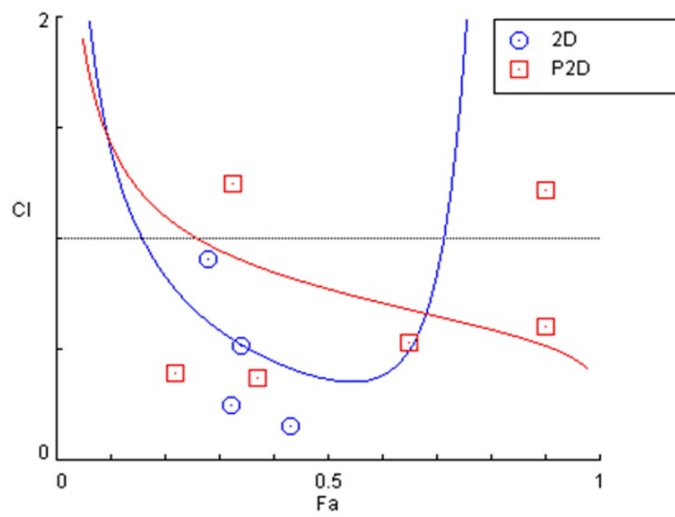

Figure 14-S: Combination Index (CI) plot, for P2D and 2D.

Table 2-S: Combination index (CI) results for P2D and 2D, in different doses, calculated by CompuSyn software.

| Total dose (ppm) | P2D   |       | 2D    |         |
|------------------|-------|-------|-------|---------|
|                  | Fa    | CI    | Fa    | CI      |
| 0.058            | 0.9   | 0.605 | 0.873 | 20.054  |
| 0.117            | 0.9   | 1.221 | 0.891 | 93.898  |
| 0.234            | 0.65  | 0.533 | 0.946 | 7739.77 |
| 0.468            | 0.37  | 0.370 | 0.431 | 0.156   |
| 0.937            | 0.221 | 0.393 | 0.324 | 0.249   |
| 1.875            | 0.326 | 1.25  | 0.341 | 0.518   |
| 3.75             | 0.284 | 2.101 | 0.282 | 0.909   |

Table 3-S: Cell cycle results of formulation on MDA-MB 231 cell line using flowcytometry.

| formulations | Cell cycles (%)    |                                |       |                   |
|--------------|--------------------|--------------------------------|-------|-------------------|
|              | Sub G <sub>0</sub> | G <sub>0</sub> /G <sub>1</sub> | S     | G <sub>2</sub> /M |
| P2D          | 12.84              | 20.75                          | 23.60 | 33.63             |
| 2D           | 15.63              | 53.88                          | 17.91 | 11.25             |
| PD           | 12.71              | 10.73                          | 23.82 | 37.29             |
| Dox          | 9.07               | 7.07                           | 10.09 | 32.32             |
| PC           | 1.29               | 10.03                          | 8.05  | 38.93             |
| Conf         | 3.61               | 59.84                          | 18.27 | 16.40             |
| P            | 3.78               | 46.31                          | 11.45 | 29.83             |
| Control      | 1.37               | 55.46                          | 17.67 | 24.24             |

Table 4-S: Results of apoptosis of MDA-MB-231 cell line treated with formulation (P2D, 2D, PD, Dox, PC and Conf) using flowcytometry

| Cell %  | Viable | Early apoptosis | Late apoptosis | Necrosis |
|---------|--------|-----------------|----------------|----------|
| P2D     | 0.95   | 1.45            | 93.9           | 3.72     |
| 2D      | 12.2   | 22.6            | 36.1           | 29.2     |
| PD      | 7.17   | 4.89            | 74.9           | 13.0     |
| Dox     | 51.7   | 17.9            | 8.27           | 22.1     |
| PC      | 45.4   | 12.0            | 37.8           | 4.77     |
| Conf    | 81.4   | 3.97            | 14.1           | 0.55     |
| Control | 99.5   | 0.0             | 0.0            | 0.50     |

Table 5-5: Western blotting results of P2D, fold change of Bax, Bcl2, pro-Casp9, Cleaved-Casp9, pro-Casp3, Cleaved-Casp3, pro-Casp7, Cleaved-Casp7 and P27 proteins related to control (= 1).

| Fold change | proteins |     |           |          |           |          |           |          |      |
|-------------|----------|-----|-----------|----------|-----------|----------|-----------|----------|------|
|             | Bcl-2    | Bax | Pro-casp9 | Cl-casp9 | Pro-casp3 | Cl-casp3 | Pro-casp7 | Cl-casp7 | P27  |
| P2D         | 0.839    | 1.7 | 0.634     | 1.76     | 0.89      | 1.82     | 0.696     | 1.033    | 1.04 |
